# Supplementary material for: An Atlas of Human Regulatory T Helper-like Cells Reveals Features of Th2-like Tregs that Support a Tumorigenic Environment
Source: PubMed Central journal article supplement (PMC5529316; doi:10.1016/j.celrep.2017.06.079), 2017-07-18
Supplement: mmc1.pdf [file mmc1.pdf]

**Cell Reports, Volume 20**

**Supplemental Information**

**An Atlas of Human Regulatory T Helper-like  
Cells Reveals Features of Th2-like Tregs  
that Support a Tumorigenic Environment**

**Leena Halim, Marco Romano, Reuben McGregor, Isabel Correa, Polychronis Pavlidis, Nathali Grageda, Sec-Julie Hoong, Muhammed Yuksel, Wayel Jassem, Rosalind F. Hannen, Mark Ong, Olivia Mckinney, Bu'Hussain Hayee, Sophia N. Karagiannis, Nicholas Powell, Robert I. Lechler, Estefania Nova-Lamperti, and Giovanna Lombardi**

## Supplemental Material

### Supplemental Figures

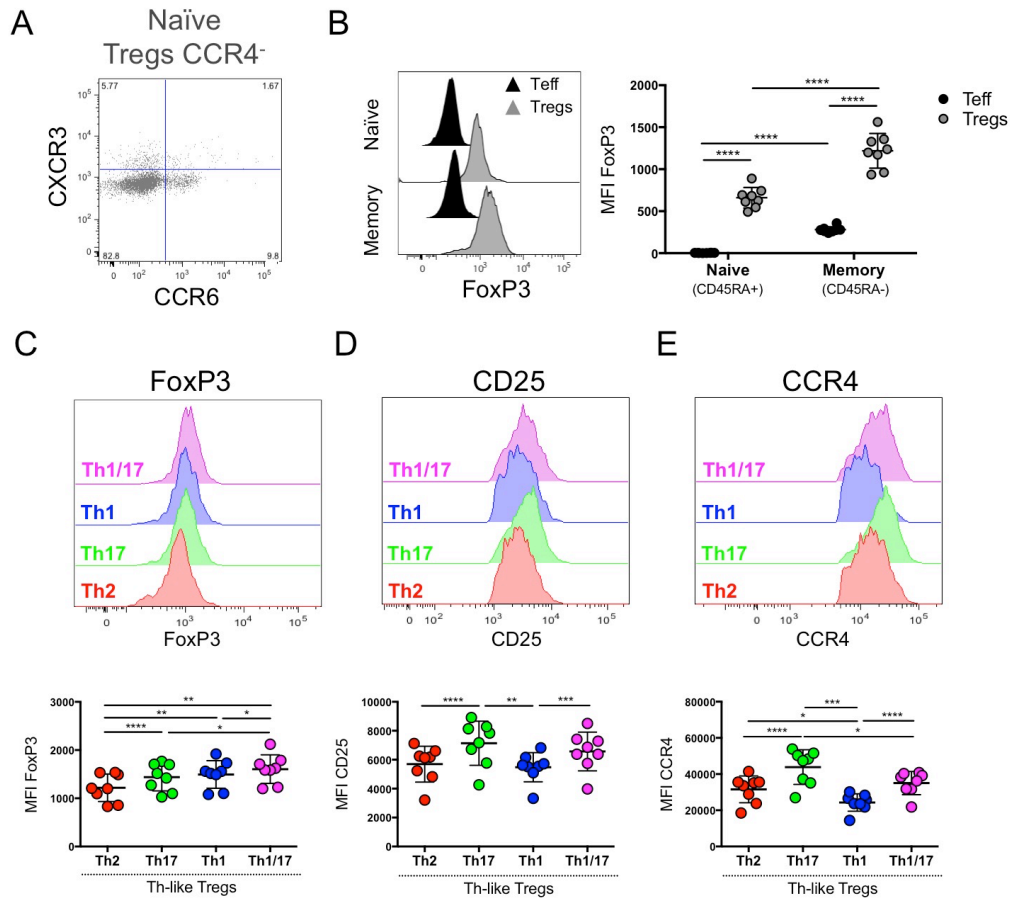

**Figure S1: Comparison of FoxP3, CD25 and CCR4 expression between Th-like Teff and Treg subsets from healthy volunteers, related to Figure 1.**

(A) Representative histograms of CCR4, CXCR3 and CCR6 expression analysed in naïve CD45RA<sup>+</sup> CD4<sup>+</sup>CD25<sup>hi</sup>CD127<sup>low</sup> Tregs. (B) Representative histograms and median fluorescence intensity (MFI) of FoxP3 expression in naïve and memory Teff and Tregs [n=8, mean ± SEM using independent values, RM Two-way ANOVA with Sidak's multiple comparison test]. (C) Representative histograms and MFI of FoxP3, (C) CD25 and (D) CCR4 between Th-like Tregs [n=8, mean ± SEM using independent values, RM One-way ANOVA with Tukey's multiple comparison test]. For all statistical tests \*\*\*\*  $P < 0.0001$ , \*\*\*  $P < 0.001$ , \*\*  $P < 0.01$  and \*  $P < 0.05$  were considered significant.

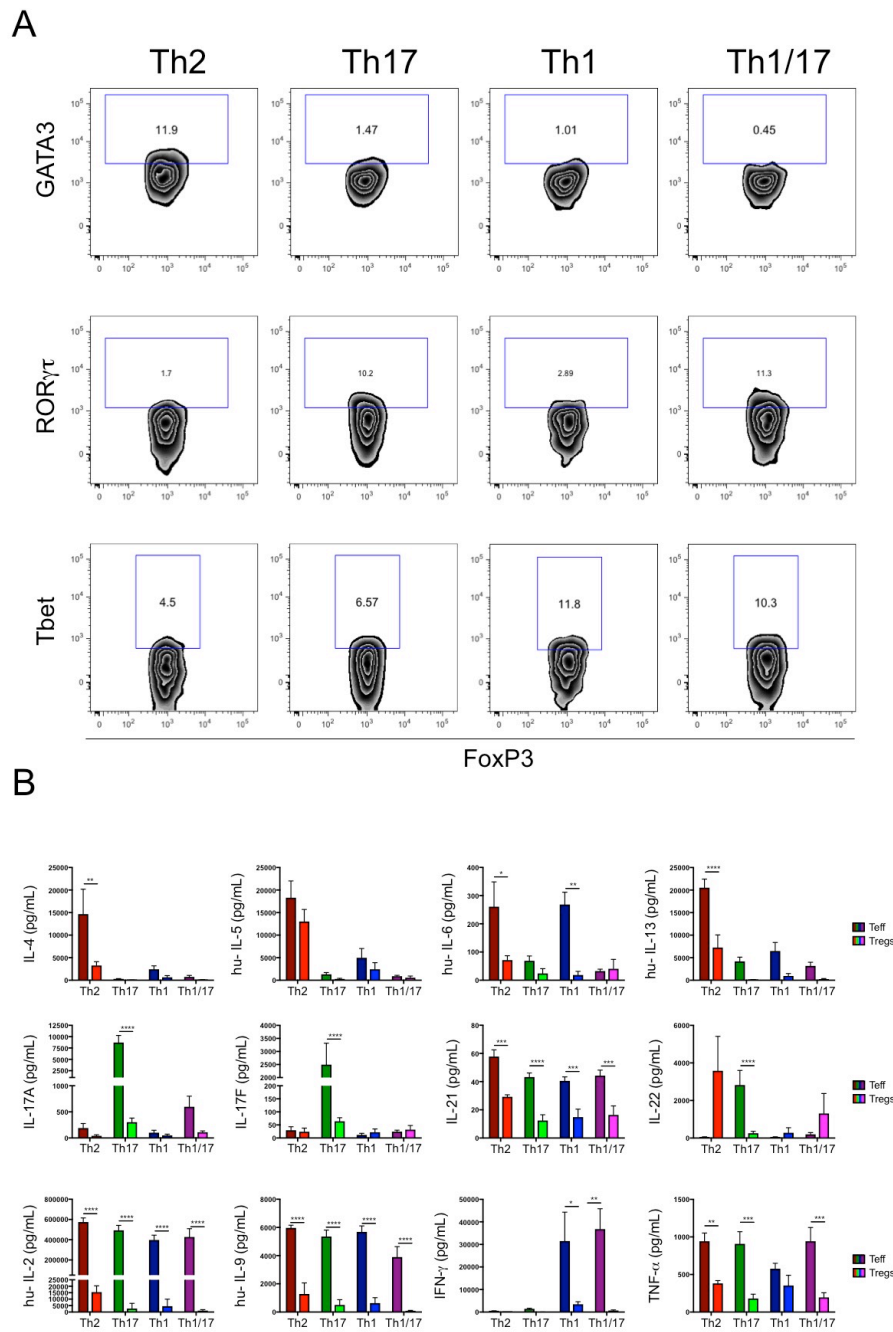

**Figure S2: Transcription Factors expression by Th-like Treg subsets, related to Figure 1.**

(A) Representative contour plots of GATA-3, Tbet and ROR $\gamma$ t expression in resting FoxP3<sup>+</sup> Th-like Tregs. (B) Absolute values of cytokine production by activated Th-like Teff [■Th2, ■Th17, ■Th1 & ■Th1/17] and Th-like Treg subsets [■Th2, ■Th17, ■Th1 & ■Th1/17] [n=5, mean  $\pm$  SEM using bar charts, RM Two-way ANOVA with Sidak's test]. For all statistical tests \*\*\*\*  $P < 0.0001$ , \*\*\*  $P < 0.001$ , \*\*  $P < 0.01$  and \*  $P < 0.05$  were considered significant.

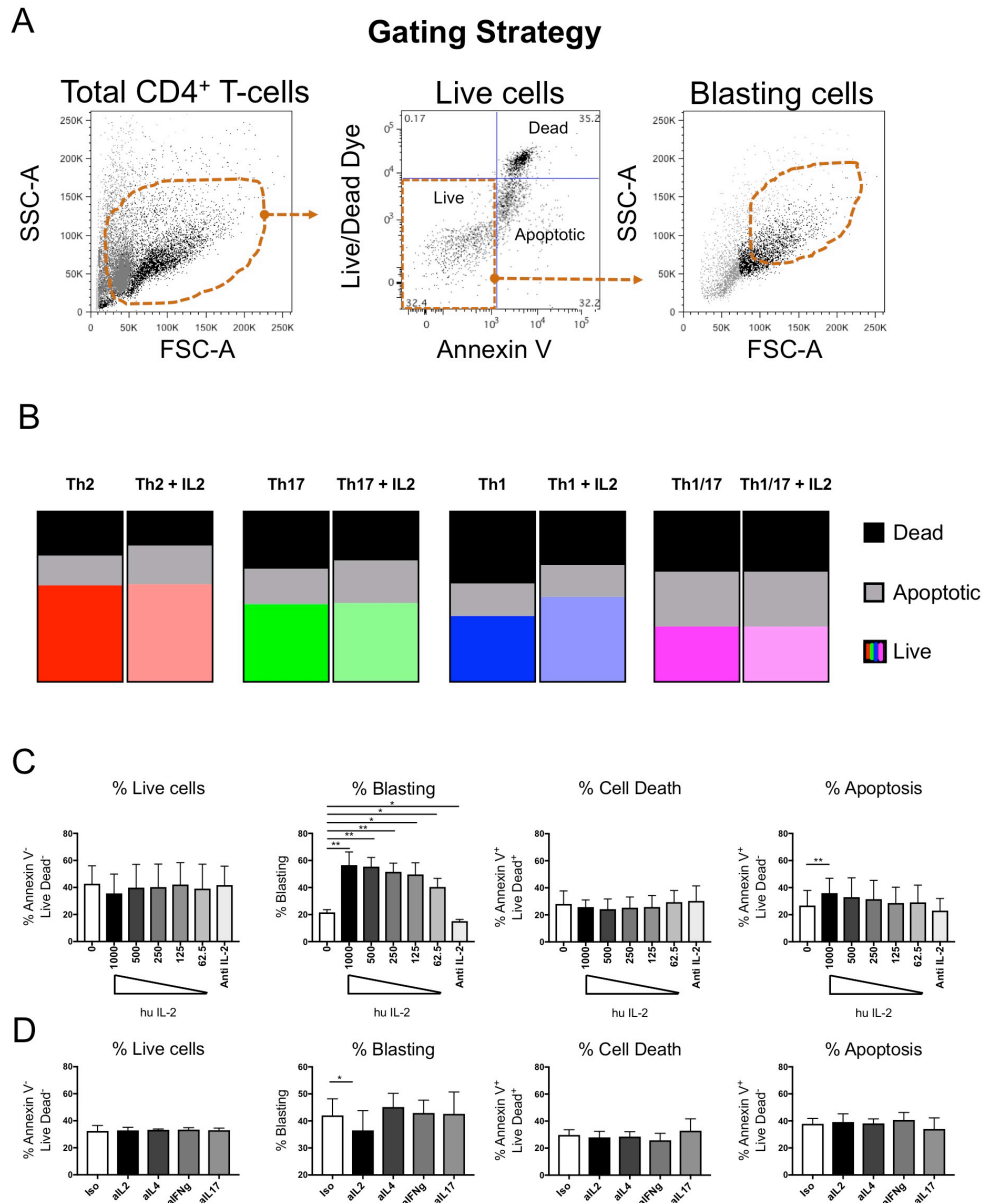

**Figure S3: Cytokine effect in Th-like Treg viability and blasting, related to Figure 2.**

(A) Gating strategy to identify live cells as Live/Dead dye<sup>-</sup> Annexin V<sup>-</sup>, apoptotic cells as Live/Dead dye<sup>-</sup> Annexin V<sup>+</sup> and dead cells as Live/Dead dye<sup>+</sup> Annexin V<sup>+</sup> from total CD4<sup>+</sup> cells, and then blasting cells among live cells. (B) Distribution of dead, apoptotic and live cells between Th-like Tregs in the presence of exogenous IL-2 (250U/mL) [n=5]. (C) Percentages of dead, apoptotic, live and blasting cells in total memory Tregs in the presence of exogenous IL-2 (concentration curve) or (D) neutralizing antibodies for IL-2, IL-4, IFN- $\gamma$  and IL-17 (all at 10 $\mu$ g/mL) [n=4, mean  $\pm$  SD using bars, RM One-way ANOVA with Dunnet's test]. For all statistical tests \*\*\*\*  $P < 0.0001$ , \*\*\*  $P < 0.001$ , \*\*  $P < 0.01$  and \*  $P < 0.05$  were considered significant.

A

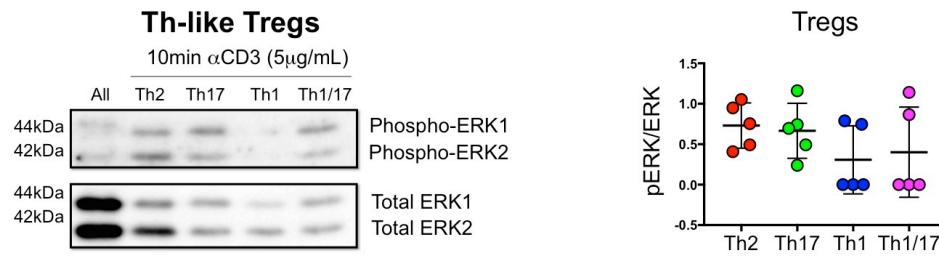

B

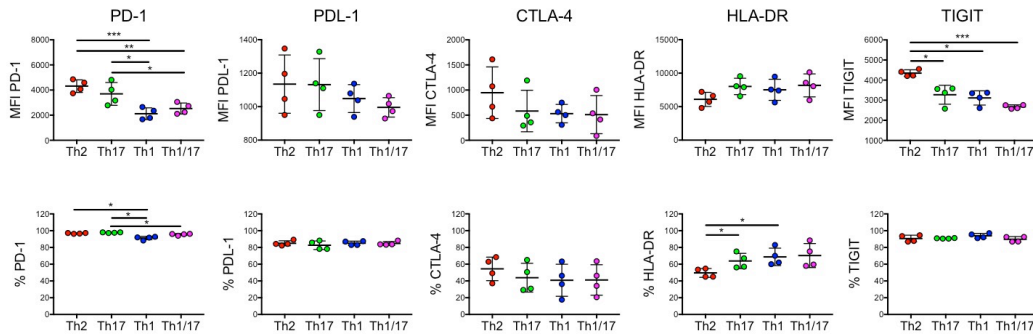

**Figure S4: ERK phosphorylation in Th-like Treg and Teff subsets after 10min-post TCR activation, related to Figure 2 and 3.**

(A) Representative western blot and absolute number of pERK/ERK ratio between Th-like Tregs. Sorted Th-like Treg subsets were activated with plate bound CD3/CD28 (2 $\mu$ g/mL) on a 96 U-bottom plate for 10min/37 $^{\circ}$ (C). pERK1/2 and ERK1/2 was detected by western blot [n=5, mean  $\pm$  SEM using independent values, RM One-way ANOVA with Tukey's multiple comparison test]. (B) MFI and percentages of PD-1, PDL-1, CTLA-4, HLA-DR and TIGIT in sorted TCR-activated Th-like Treg subsets [n=4, individual values, RM One-way ANOVA with Tukey's multiple comparison test]. For all statistical tests \*\*\*\*  $P < 0.0001$ , \*\*\*  $P < 0.001$ , \*\*  $P < 0.01$  and \*  $P < 0.05$  were considered significant.

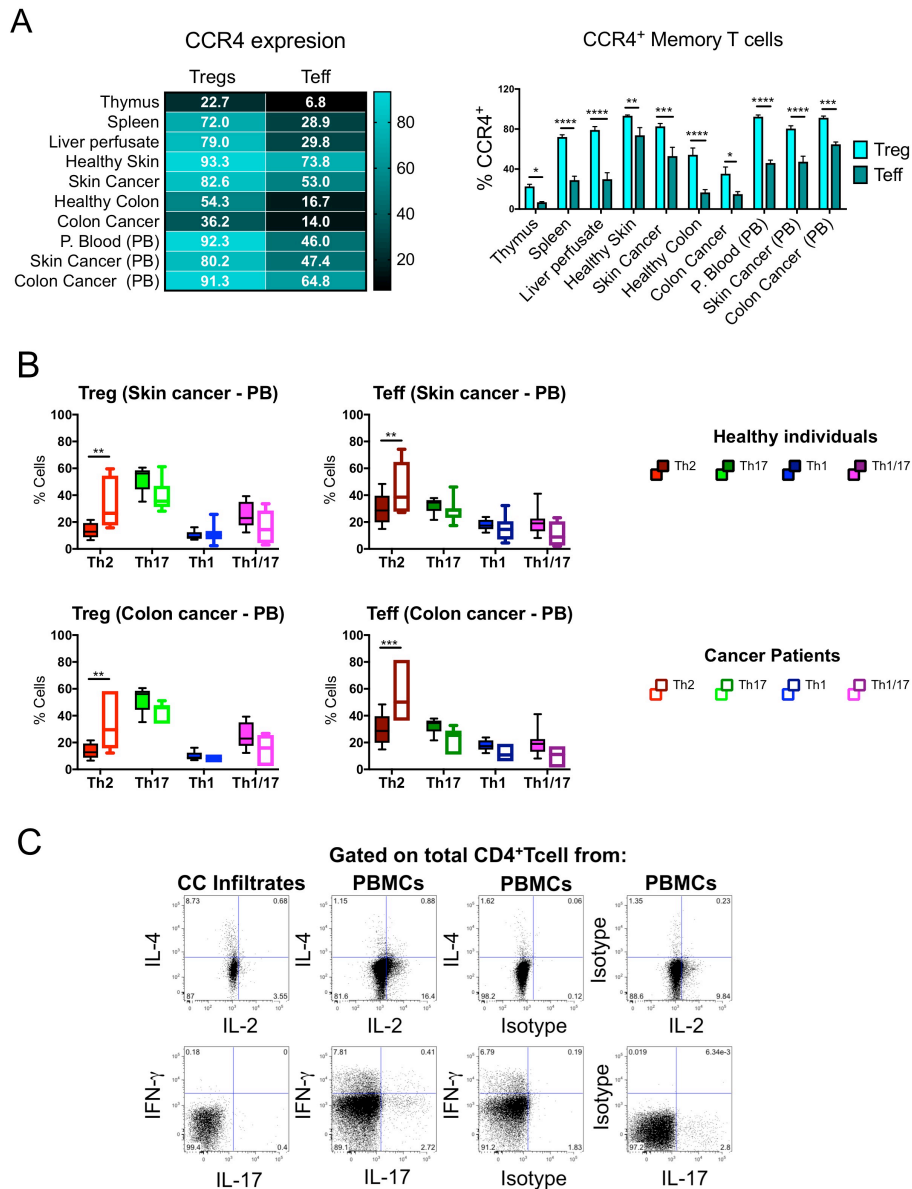

**Figure S5: CCR4 expression in Teff and Treg subsets, related to Figure 5.**

(A) Heat map with average values and total percentages of CCR4<sup>+</sup> cells within memory Treg or Teff from tissues and peripheral blood (PB) [mean  $\pm$  SEM using bar charts, Two-way ANOVA with Sidak's test]. (B) Th-like distribution between samples obtained from peripheral blood (PB) from healthy individuals and patients with skin or colon cancer [mean  $\pm$  SEM using box plots, RM Two-way ANOVA with Sidak's multiple comparison test]. (C) Intracellular staining of IL-2, IL-4, IFN- $\gamma$  and IL-17 in total CD4<sup>+</sup>T-cells from colon cancer (CC) area using CD4<sup>+</sup>T-cells from PBMCs and isotypes as positive and negative controls.

Supplemental Tables

| Th1, Th2 and Th17 lineage                        |          |           |             |          |           |            |          |           |               |
|--------------------------------------------------|----------|-----------|-------------|----------|-----------|------------|----------|-----------|---------------|
|                                                  | P-Value  | Fold Reg. | Th17 vs Th2 | P-Value  | Fold Reg. | Th1 vs Th2 | P-Value  | Fold Reg. | Th1/17 vs Th2 |
| GATA3                                            | 1.02E-04 | -3.06     | Th17 down   | 1.33E-04 | -2.79     | Th1 down   | 8.75E-05 | -3.24     | Th1/17 down   |
| RORA                                             | 9.59E-05 | 2.07      | Th17 up     |          |           |            | 2.08E-03 | 1.60      | Th1/17 up     |
| RORC                                             | 1.08E-02 | 10.95     | Th17 up     |          |           |            | 1.01E-01 | 6.29      | Th1/17 up     |
| TBX21                                            |          |           |             | 1.05E-02 | 4.71      | Th1 up     | 6.77E-02 | 3.25      | Th1/17 up     |
| CCR6                                             | 4.65E-06 | 16.74     | Th17 up     |          |           |            | 3.45E-04 | 8.41      | Th1/17 up     |
| CXCR3                                            |          |           |             | 1.51E-03 | 7.51      | Th1 up     | 1.48E-02 | 5.00      | Th1/17 up     |
| IL4                                              | 4.52E-02 | -107.28   | Th17 down   | 1.62E-01 | -2.67     | Th1 down   | 4.65E-02 | -57.32    | Th1/17 down   |
| IL5                                              | 3.31E-02 | -305.20   | Th17 down   | 5.58E-02 | -6.97     | Th1 down   | 3.38E-02 | -119.08   | Th1/17 down   |
| IL13                                             | 6.61E-02 | -359.98   | Th17 down   | 1.07E-01 | -6.29     | Th1 down   | 6.71E-02 | -129.86   | Th1/17 down   |
| IL17C                                            | 1.00E-02 | 3.24      | Th17 up     |          |           |            | 5.95E-02 | 2.40      | Th1/17 up     |
| IL17A                                            | 6.46E-02 | 6.43      | Th17 up     |          |           |            | 2.88E-01 | 3.80      | Th1/17 up     |
| IFNG                                             |          |           |             | 6.49E-02 | 25.85     | Th1 up     | 4.71E-01 | 9.48      | Th1/17 up     |
| JAK-STAT and T-cell Receptor Signalling Pathways |          |           |             |          |           |            |          |           |               |
|                                                  | P-Value  | Fold Reg. | Th17 vs Th2 | P-Value  | Fold Reg. | Th1 vs Th2 | P-Value  | Fold Reg. | Th1/17 vs Th2 |
| BCL2L1                                           | 7.44E-02 | -1.71     | Th17 down   |          |           |            | 8.62E-02 | -1.65     | Th1/17 down   |
| CSF2                                             | 8.01E-02 | -17.48    | Th17 down   | 3.51E-01 | -1.83     | Th1 down   | 1.30E-01 | -4.69     | Th1/17 down   |
| IFNG                                             |          |           |             | 6.49E-02 | 25.85     | Th1 up     | 4.71E-01 | 9.48      | Th1/17 up     |
| IFNGR1                                           |          |           |             |          |           |            | 1.43E-03 | -1.50     | Th1/17 down   |
| IL10RA                                           | 1.43E-01 | 1.50      | Th17 up     | 8.83E-02 | 1.60      | Th1 up     |          |           |               |
| IL12RB2                                          |          |           |             | 3.92E-02 | 2.51      | Th1 up     | 4.35E-02 | 2.47      | Th1/17 up     |
| IL2                                              | 9.32E-02 | -3.57     | Th17 down   | 2.31E-01 | -1.93     | Th1 down   |          |           |               |
| IL4                                              | 4.52E-02 | -107.28   | Th17 down   | 1.62E-01 | -2.67     | Th1 down   | 4.65E-02 | -57.32    | Th1/17 down   |
| IL5                                              | 3.31E-02 | -305.20   | Th17 down   | 5.58E-02 | -6.97     | Th1 down   | 3.38E-02 | -119.08   | Th1/17 down   |
| IL7R                                             | 1.28E-01 | 3.03      | Th17 up     | 6.53E-01 | 1.54      | Th1 up     | 5.08E-02 | 3.80      | Th1/17 up     |
| IL9                                              | 3.09E-02 | -162.69   | Th17 down   | 4.12E-02 | -12.13    | Th1 down   | 3.26E-02 | -49.39    | Th1/17 down   |
| LIF                                              | 2.65E-02 | -5.34     | Th17 down   | 4.11E-02 | -3.57     | Th1 down   | 3.42E-02 | -4.14     | Th1/17 down   |
| SOCS1                                            | 6.25E-03 | -3.30     | Th17 down   | 3.05E-02 | -1.91     | Th1 down   | 7.10E-03 | -3.10     | Th1/17 down   |
| SOCS3                                            | 2.11E-02 | -6.09     | Th17 down   |          |           |            | 3.14E-02 | -4.05     | Th1/17 down   |
| STAT3                                            |          |           |             |          |           |            | 5.61E-03 | -1.81     | Th1/17 down   |
| STAT4                                            |          |           |             | 1.35E-03 | -1.76     | Th1 down   |          |           |               |
| STAT5A                                           | 3.31E-02 | -1.52     | Th17 down   |          |           |            | 1.64E-02 | -1.69     | Th1/17 down   |
| STAT6                                            | 1.07E-01 | -1.53     | Th17 down   | 9.96E-02 | -1.56     | Th1 down   | 4.96E-02 | -1.82     | Th1/17 down   |
| CDC42                                            |          |           |             |          |           |            | 1.13E-02 | -1.64     | Th1/17 down   |
| NFKBIA                                           | 6.41E-02 | -2.78     | Th17 down   | 2.67E-01 | -1.53     | Th1 down   | 2.04E-01 | -1.68     | Th1/17 down   |
| Cytokines                                        |          |           |             |          |           |            |          |           |               |
|                                                  | P-Value  | Fold Reg. | Th17 vs Th2 | P-Value  | Fold Reg. | Th1 vs Th2 | P-Value  | Fold Reg. | Th1/17 vs Th2 |
| IL1A                                             | 5.14E-02 | -3.05     | Th17 down   | 1.13E-01 | -2.06     | Th1 down   | 1.87E-01 | -1.70     | Th1/17 down   |
| IL2                                              | 9.32E-02 | -3.57     | Th17 down   | 2.31E-01 | -1.93     | Th1 down   |          |           |               |
| IL6                                              |          |           |             | 1.79E-01 | -2.62     | Th1 down   | 6.09E-02 | -15.80    | Th1/17 down   |
| IL7                                              | 5.40E-03 | 2.72      | Th17 up     | 1.40E-01 | 1.69      | Th1 up     | 9.61E-02 | 1.80      | Th1/17 up     |
| IL9                                              | 3.09E-02 | -162.69   | Th17 down   | 4.12E-02 | -12.13    | Th1 down   | 3.26E-02 | -49.39    | Th1/17 down   |

|                              |                |                  |                    |                |                  |                   |                |                  |                      |
|------------------------------|----------------|------------------|--------------------|----------------|------------------|-------------------|----------------|------------------|----------------------|
| IL15                         | 3.86E-01       | 1.64             | Th17 up            | 3.93E-02       | 2.80             | Th1 up            | 1.98E-02       | 3.16             | Th1/17 up            |
| IL21                         | 1.56E-02       | -15.16           | Th17 down          | 1.90E-01       | -1.71            | Th1 down          | 1.82E-02       | -10.01           | Th1/17 down          |
| IL24                         | 2.48E-02       | -9.36            | Th17 down          | 4.66E-02       | -4.00            | Th1 down          | 2.04E-02       | -16.29           | Th1/17 down          |
| IFNG                         |                |                  |                    | 6.49E-02       | 25.85            | Th1 up            | 4.71E-01       | 9.48             | Th1/17 up            |
| <b>Pro-apoptotic genes</b>   |                |                  |                    |                |                  |                   |                |                  |                      |
|                              | <b>P-Value</b> | <b>Fold Reg.</b> | <b>Th17 vs Th2</b> | <b>P-Value</b> | <b>Fold Reg.</b> | <b>Th1 vs Th2</b> | <b>P-Value</b> | <b>Fold Reg.</b> | <b>Th1/17 vs Th2</b> |
| CASP1                        | 2.22E-02       | 1.88             | Th17 up            | 7.50E-02       | 1.62             | Th1 up            | 1.19E-02       | 2.02             | Th1/17 up            |
| CASP8                        | 1.85E-02       | 1.54             | Th17 up            |                |                  |                   |                |                  |                      |
| CD27                         | 1.04E-01       | 2.12             | Th17 up            | 5.05E-02       | 2.43             | Th1 up            | 4.34E-02       | 2.49             | Th1/17 up            |
| CD40                         | 9.52E-02       | -1.55            | Th17 down          |                |                  |                   |                |                  |                      |
| FADD                         |                |                  |                    |                |                  |                   | 1.48E-02       | -1.98            | Th1/17 down          |
| FASLG                        | 2.35E-02       | -2.62            | Th17 down          |                |                  |                   | 4.35E-02       | -2.09            | Th1/17 down          |
| TNFRSF10A                    | 1.42E-02       | 1.69             | Th17 up            |                |                  |                   | 2.89E-02       | 1.57             | Th1/17 up            |
| TNFRSF8                      | 6.10E-02       | -2.29            | Th17 down          | 2.16E-01       | -1.51            | Th1 down          | 4.79E-02       | -2.54            | Th1/17 down          |
| TP53                         |                |                  |                    |                |                  |                   | 1.23E-02       | -2.11            | Th1/17 down          |
| <b>Anti-apoptotic genes</b>  |                |                  |                    |                |                  |                   |                |                  |                      |
|                              | <b>P-Value</b> | <b>Fold Reg.</b> | <b>Th17 vs Th2</b> | <b>P-Value</b> | <b>Fold Reg.</b> | <b>Th1 vs Th2</b> | <b>P-Value</b> | <b>Fold Reg.</b> | <b>Th1/17 vs Th2</b> |
| CD40LG                       | 8.44E-02       | -1.94            | Th17 down          | 1.13E-01       | -1.77            | Th1 down          | 6.13E-02       | -2.17            | Th1/17 down          |
| CSF2                         | 8.01E-02       | -17.48           | Th17 down          | 3.51E-01       | -1.83            | Th1 down          | 1.30E-01       | -4.69            | Th1/17 down          |
| IL2                          | 9.32E-02       | -3.57            | Th17 down          | 2.31E-01       | -1.93            | Th1 down          |                |                  |                      |
| IL4                          | 4.52E-02       | -107.28          | Th17 down          | 1.62E-01       | -2.67            | Th1 down          | 4.65E-02       | -57.32           | Th1/17 down          |
| IL6                          |                |                  |                    | 1.79E-01       | -2.62            | Th1 down          | 6.09E-02       | -15.80           | Th1/17 down          |
| MYC                          | 7.61E-03       | -2.44            | Th17 down          | 1.39E-02       | -2.06            | Th1 down          | 5.27E-03       | -2.77            | Th1/17 down          |
| PTGDR2                       | 1.11E-02       | -10.94           | Th17 down          | 1.29E-02       | -8.15            | Th1 down          | 8.28E-03       | -35.36           | Th1/17 down          |
| NFKB2                        | 5.19E-02       | -2.17            | Th17 down          | 1.31E-01       | -1.64            | Th1 down          | 6.48E-02       | -2.01            | Th1/17 down          |
| TNFRSF4                      | 1.67E-02       | -2.87            | Th17 down          | 3.39E-02       | -2.18            | Th1 down          | 2.51E-02       | -2.43            | Th1/17 down          |
| <b>Transcription Factors</b> |                |                  |                    |                |                  |                   |                |                  |                      |
|                              | <b>P-Value</b> | <b>Fold Reg.</b> | <b>Th17 vs Th2</b> | <b>P-Value</b> | <b>Fold Reg.</b> | <b>Th1 vs Th2</b> | <b>P-Value</b> | <b>Fold Reg.</b> | <b>Th1/17 vs Th2</b> |
| CEBPB                        | 3.50E-02       | -2.86            | Th17 down          |                |                  |                   | 4.06E-02       | -2.65            | Th1/17 down          |
| FOSL1                        | 5.95E-02       | -2.35            | Th17 down          | 1.41E-01       | -1.72            | Th1 down          | 9.21E-02       | -1.98            | Th1/17 down          |
| GATA3                        | 1.02E-04       | -3.06            | Th17 down          | 1.33E-04       | -2.79            | Th1 down          | 8.75E-05       | -3.24            | Th1/17 down          |
| IRF1                         |                |                  |                    | 1.10E-03       | 1.89             | Th1 up            | 1.99E-03       | 1.80             | Th1/17 up            |
| IRF4                         | 2.60E-03       | -2.42            | Th17 down          | 2.62E-02       | -1.53            | Th1 down          | 2.16E-03       | -2.55            | Th1/17 down          |
| IRF8                         | 8.15E-02       | -7.11            | Th17 down          |                |                  |                   | 8.39E-02       | -6.71            | Th1/17 down          |
| NFATC1                       |                |                  |                    |                |                  |                   | 2.31E-04       | -1.68            | Th1/17 down          |
| RORA                         | 9.59E-05       | 2.07             | Th17 up            |                |                  |                   | 2.08E-03       | 1.60             | Th1/17 up            |
| RORC                         | 1.08E-02       | 10.95            | Th17 up            |                |                  |                   | 1.01E-01       | 6.29             | Th1/17 up            |
| RUNX1                        | 6.53E-02       | 2.05             | Th17 up            |                |                  |                   | 2.26E-01       | 1.63             | Th1/17 up            |
| RUNX3                        | 1.57E-02       | -1.64            | Th17 down          |                |                  |                   | 4.06E-02       | -2.65            | Th1/17 down          |
| TBX21                        |                |                  |                    | 1.05E-02       | 4.71             | Th1 up            | 6.77E-02       | 3.25             | Th1/17 up            |
| <b>Cytokines Receptors</b>   |                |                  |                    |                |                  |                   |                |                  |                      |
|                              | <b>P-Value</b> | <b>Fold Reg.</b> | <b>Th17 vs Th2</b> | <b>P-Value</b> | <b>Fold Reg.</b> | <b>Th1 vs Th2</b> | <b>P-Value</b> | <b>Fold Reg.</b> | <b>Th1/17 vs Th2</b> |
| IL1R1                        | 3.11E-02       | 2.02             | Th17 up            |                |                  |                   |                |                  |                      |
| IL1RAP                       | 1.77E-02       | -2.27            | Th17 down          | 7.07E-02       | -1.61            | Th1 down          | 1.38E-02       | -2.46            | Th1/17 down          |
| IL1RL1                       | 7.20E-02       | -12.93           | Th17 down          | 8.20E-02       | -8.53            | Th1 down          | 6.76E-02       | -17.31           | Th1/17 down          |



|                 |          |        |           |          |        |          |          |        |             |
|-----------------|----------|--------|-----------|----------|--------|----------|----------|--------|-------------|
| <b>IL1RN</b>    | 7.93E-02 | -2.50  | Th17 down | 1.15E-01 | -2.09  | Th1 down | 2.29E-01 | -1.61  | Th1/17 down |
| <b>IL2RA</b>    | 3.71E-02 | -1.74  | Th17 down | 5.08E-02 | -1.64  | Th1 down | 1.93E-02 | -2.03  | Th1/17 down |
| <b>IL3RA</b>    | 7.96E-02 | -7.15  | Th17 down | 1.06E-01 | -4.46  | Th1 down | 6.55E-02 | -12.14 | Th1/17 down |
| <b>IL4R</b>     | 3.81E-03 | -1.78  | Th17 down | 1.93E-03 | -2.01  | Th1 down | 1.70E-03 | -2.06  | Th1/17 down |
| <b>IL6R</b>     | 2.63E-02 | 1.72   | Th17 up   | 1.35E-02 | 1.84   | Th1 up   |          |        |             |
| <b>IL7R</b>     | 1.28E-01 | 3.03   | Th17 up   | 6.53E-01 | 1.54   | Th1 up   | 5.08E-02 | 3.80   | Th1/17 up   |
| <b>IL9R</b>     | 1.25E-02 | -10.82 | Th17 down | 2.60E-02 | -4.13  | Th1 down | 1.07E-02 | -16.97 | Th1/17 down |
| <b>IL10RA</b>   | 1.43E-01 | 1.50   | Th17 up   | 8.83E-02 | 1.60   | Th1 up   |          |        |             |
| <b>IL12RB1</b>  | 4.79E-02 | 1.60   | Th17 up   |          |        |          |          |        |             |
| <b>IL17RA</b>   | 1.18E-01 | 1.63   | Th17 up   | 1.61E-01 | 1.55   | Th1 up   | 7.44E-02 | 1.75   | Th1/17 up   |
| <b>IL17RB</b>   | 4.94E-03 | -3.61  | Th17 down | 1.39E-03 | -15.17 | Th1 down | 1.44E-03 | -13.99 | Th1/17 down |
| <b>IL17RE</b>   | 3.39E-02 | 2.78   | Th17 up   | 5.58E-01 | -1.68  | Th1 down |          |        |             |
| <b>IFNGR2</b>   | 5.41E-04 | -2.33  | Th17 down | 5.02E-05 | -7.90  | Th1 down | 4.58E-05 | -8.89  | Th1/17 down |
| <b>LEPR</b>     | 7.44E-04 | 1.89   | Th17 up   |          |        |          | 7.91E-03 | 1.55   | Th1/17 up   |
| <b>LTA</b>      | 5.63E-02 | -3.91  | Th17 down | 1.85E-01 | -1.90  | Th1 down | 1.35E-01 | -2.19  | Th1/17 down |
| <b>TNFSF4</b>   | 6.54E-03 | 1.91   | Th17 up   | 5.91E-02 | 1.52   | Th1 up   |          |        |             |
| <b>TNFSF11</b>  | 1.22E-02 | -5.20  | Th17 down | 2.36E-02 | -3.19  | Th1 down | 9.27E-03 | -7.11  | Th1/17 down |
| <b>TNFSF13</b>  |          |        |           |          |        |          | 6.79E-02 | -1.73  | Th1/17 down |
| <b>TNFSF13B</b> | 3.92E-02 | 4.80   | Th17 up   | 1.71E-01 | 3.25   | Th1 up   | 1.34E-02 | 6.02   | Th1/17 up   |
| <b>TNFSF14</b>  | 2.33E-02 | -3.05  | Th17 down | 1.80E-02 | -3.53  | Th1 down | 4.04E-02 | -2.38  | Th1/17 down |
| <b>TNFRSF14</b> |          |        |           | 1.53E-03 | 1.65   | Th1 up   |          |        |             |

**Table S1: Inflammatory & immunity transcriptome data set of activated Th-like Treg subsets: Lineage and activation pathways, related to Figure 1, 2 and 6.**

Heat map table showing p values and fold-regulation of RNA-Seq data set obtained from Th-like Treg subsets 3 days post-TCR activation using Partek® Software. Th17, Th1 and Th1/17 Th-like Treg subsets were Test Groups, whereas Th2-like Tregs was the Control Group. *Exclusion criteria:* Genes with fold change <1.5 or with average molecular tag count <10, in both the Control and Test Groups or with p value higher than 0.1 in the three Test Groups vs Control are not shown in this table. *Colours:* **RED** represents higher expression in Th2-like Tregs, **GREEN** higher expression in Th17-like Tregs, **BLUE** higher expression in Th1-like Tregs and **PINK** higher expression in Th1/17-like Tregs. Genes were clustered according to the Human Inflammation & Immunity Transcriptome gene list and Partek® Pathway.

| Leukocyte trans-endothelial migration |          |           |             |          |           |            |          |           |               |
|---------------------------------------|----------|-----------|-------------|----------|-----------|------------|----------|-----------|---------------|
|                                       | P-Value  | Fold Reg. | Th17 vs Th2 | P-Value  | Fold Reg. | Th1 vs Th2 | P-Value  | Fold Reg. | Th1/17 vs Th2 |
| CDC42                                 |          |           |             |          |           |            | 1.13E-02 | -1.64     | Th1/17 down   |
| CXCR4                                 |          |           |             | 4.66E-04 | -1.66     | Th1 down   |          |           |               |
| ICAM1                                 | 3.99E-02 | -3.65     | Th17 down   | 2.35E-01 | -1.58     | Th1 down   | 7.78E-02 | -2.44     | Th1/17 down   |
| ITGAM                                 | 5.51E-02 | -3.34     | Th17 down   |          |           |            | 1.00E-01 | -2.34     | Th1/17 down   |
| ITGB2                                 |          |           |             |          |           |            | 3.01E-02 | -1.69     | Th1/17 down   |
| RAC1                                  |          |           |             |          |           |            | 7.71E-03 | -1.54     | Th1/17 down   |
| VAV1                                  |          |           |             |          |           |            | 1.66E-02 | -1.90     | Th1/17 down   |
| Chemokines Receptors                  |          |           |             |          |           |            |          |           |               |
|                                       | P-Value  | Fold Reg. | Th17 vs Th2 | P-Value  | Fold Reg. | Th1 vs Th2 | P-Value  | Fold Reg. | Th1/17 vs Th2 |
| CCR2                                  | 1.81E-01 | 6.36      | Th17 up     | 3.15E-02 | 10.88     | Th1 up     | 2.71E-02 | 11.29     | Th1/17 up     |
| CCR5                                  | 8.39E-02 | 4.67      | Th17 up     | 2.61E-02 | 6.20      | Th1 up     | 1.02E-01 | 4.41      | Th1/17 up     |
| CCR6                                  | 4.65E-06 | 16.74     | Th17 up     |          |           |            | 3.45E-04 | 8.41      | Th1/17 up     |
| CCR9                                  | 6.25E-02 | 1.82      | Th17 up     |          |           |            |          |           |               |
| CXCR3                                 |          |           |             | 1.51E-03 | 7.51      | Th1 up     | 1.48E-02 | 5.00      | Th1/17 up     |
| CXCR4                                 |          |           |             | 4.66E-04 | -1.66     | Th1 down   |          |           |               |
| CXCR5                                 | 7.21E-02 | -2.46     | Th17 down   |          |           |            | 2.73E-02 | -4.76     | Th1/17 down   |
| CXCR6                                 | 3.38E-03 | 2.76      | Th17 up     | 1.84E-02 | 2.20      | Th1 up     | 2.00E-02 | 2.18      | Th1/17 up     |
| Chemokines                            |          |           |             |          |           |            |          |           |               |
|                                       | P-Value  | Fold Reg. | Th17 vs Th2 | P-Value  | Fold Reg. | Th1 vs Th2 | P-Value  | Fold Reg. | Th1/17 vs Th2 |
| CCL3                                  | 6.14E-02 | -9.73     | Th17 down   |          |           |            | 1.36E-01 | -3.05     | Th1/17 down   |
| CCL17                                 | 2.73E-02 | -20.63    | Th17 down   | 6.94E-02 | -3.62     | Th1 down   | 4.16E-02 | -6.53     | Th1/17 down   |
| CCL24                                 | 2.42E-02 | -3.19     | Th17 down   | 1.31E-01 | -1.67     | Th1 down   | 1.10E-02 | -5.92     | Th1/17 down   |
| CXCL8                                 | 1.25E-01 | -2.24     | Th17 down   | 3.04E-02 | -8.05     | Th1 down   | 6.42E-02 | -3.37     | Th1/17 down   |
| CXCL13                                | 9.79E-02 | 8.59      | Th17 up     |          |           |            | 8.18E-01 | 1.93      | Th1/17 up     |
| CXCL16                                | 2.82E-02 | -2.65     | Th17 down   | 6.08E-02 | -1.99     | Th1 down   | 3.51E-02 | -2.42     | Th1/17 down   |
| Innate & Adaptive Immune Responses    |          |           |             |          |           |            |          |           |               |
|                                       | P-Value  | Fold Reg. | Th17 vs Th2 | P-Value  | Fold Reg. | Th1 vs Th2 | P-Value  | Fold Reg. | Th1/17 vs Th2 |
| C3                                    | 3.31E-03 | -8.63     | Th17 down   | 6.06E-03 | -4.52     | Th1 down   | 2.48E-03 | -15.98    | Th1/17 down   |
| C3AR1                                 | 1.05E-02 | 4.03      | Th17 up     | 6.84E-02 | 2.83      | Th1 up     | 7.85E-02 | 2.75      | Th1/17 up     |
| CD14                                  | 3.16E-02 | -5.67     | Th17 down   | 5.73E-02 | -3.26     | Th1 down   | 3.93E-02 | -4.45     | Th1/17 down   |
| CD8A                                  | 3.70E-02 | -13.79    | Th17 down   | 7.11E-02 | -4.17     | Th1 down   | 4.94E-02 | -6.79     | Th1/17 down   |
| DDX58                                 | 8.82E-03 | 1.85      | Th17 up     | 3.65E-02 | 1.60      | Th1 up     | 2.67E-02 | 1.65      | Th1/17 up     |
| ELK1                                  | 6.23E-04 | -1.68     | Th17 down   |          |           |            | 1.92E-04 | -2.01     | Th1/17 down   |
| GZMA                                  |          |           |             | 1.47E-03 | 4.76      | Th1 up     |          |           |               |
| HLA-C                                 |          |           |             |          |           |            | 2.38E-02 | 1.52      | Th1/17 up     |
| HLA-E                                 | 6.34E-03 | 1.79      | Th17 up     |          |           |            | 2.47E-03 | 1.96      | Th1/17 up     |
| MX1                                   | 1.08E-02 | 2.48      | Th17 up     | 3.82E-02 | 2.07      | Th1 up     | 1.88E-02 | 2.29      | Th1/17 up     |
| NOD2                                  | 2.11E-02 | -2.57     | Th17 down   |          |           |            |          |           |               |
| TLR9                                  |          |           |             |          |           |            | 5.02E-02 | -1.63     | Th1/17 down   |
| CHUK                                  |          |           |             |          |           |            | 1.33E-02 | -1.51     | Th1/17 down   |
| HMGB1                                 |          |           |             |          |           |            | 8.68E-02 | -1.76     | Th1/17 down   |
| HSPD1                                 | 2.76E-03 | -2.02     | Th17 down   | 5.33E-03 | -1.78     | Th1 down   | 1.32E-03 | -2.40     | Th1/17 down   |

|                    |                |                  |                    |                |                  |                   |                |                  |                      |
|--------------------|----------------|------------------|--------------------|----------------|------------------|-------------------|----------------|------------------|----------------------|
| MAP3K1             | 3.79E-02       | 2.71             | Th17 up            |                |                  |                   | 3.02E-02       | 2.82             | Th1/17 up            |
| MAP2K3             |                |                  |                    |                |                  |                   | 9.10E-02       | -1.66            | Th1/17 down          |
| RELB               | 6.29E-02       | -1.80            | Th17 down          |                |                  |                   | 8.59E-02       | -1.67            | Th1/17 down          |
| UBE2N              |                |                  |                    |                |                  |                   | 4.69E-02       | -1.58            | Th1/17 down          |
| PRKCZ              | 7.54E-03       | 1.87             | Th17 up            |                |                  |                   |                |                  |                      |
| PRKRA              |                |                  |                    |                |                  |                   | 4.95E-03       | -1.75            | Th1/17 down          |
| <b>Other Genes</b> |                |                  |                    |                |                  |                   |                |                  |                      |
|                    | <b>P-Value</b> | <b>Fold Reg.</b> | <b>Th17 vs Th2</b> | <b>P-Value</b> | <b>Fold Reg.</b> | <b>Th1 vs Th2</b> | <b>P-Value</b> | <b>Fold Reg.</b> | <b>Th1/17 vs Th2</b> |
| ACKR3              |                |                  |                    | 5.29E-02       | -1.65            | Th1 down          |                |                  |                      |
| BST2               |                |                  |                    |                |                  |                   | 3.96E-02       | -1.61            | Th1/17 down          |
| BTLA               | 8.80E-03       | -1.76            | Th17 down          |                |                  |                   | 6.55E-03       | -1.85            | Th1/17 down          |
| CBLB               |                |                  |                    |                |                  |                   | 4.52E-02       | 1.55             | Th1/17 up            |
| CD2                | 1.38E-02       | 1.53             | Th17 up            |                |                  |                   |                |                  |                      |
| CD274              | 8.80E-03       | -1.95            | Th17 down          | 4.46E-03       | -2.29            | Th1 down          | 7.43E-03       | -2.02            | Th1/17 down          |
| CD276              | 2.74E-02       | -2.22            | Th17 down          |                |                  |                   |                |                  |                      |
| CD44               | 2.00E-03       | 1.88             | Th17 up            |                |                  |                   | 2.93E-03       | 1.82             | Th1/17 up            |
| CD81               |                |                  |                    |                |                  |                   | 5.45E-02       | -1.61            | Th1/17 down          |
| CDK2               | 2.36E-03       | -2.22            | Th17 down          | 6.74E-03       | -1.79            | Th1 down          | 6.22E-04       | -3.44            | Th1/17 down          |
| CDKN1B             | 6.91E-03       | 1.54             | Th17 up            |                |                  |                   |                |                  |                      |
| CIITA              |                |                  |                    |                |                  |                   | 6.79E-02       | -1.74            | Th1/17 down          |
| CSF1R              | 2.36E-01       | -1.64            | Th17 down          |                |                  |                   | 7.86E-02       | -2.68            | Th1/17 down          |
| EOMES              |                |                  |                    | 3.12E-02       | 13.07            | Th1 up            |                |                  |                      |
| FOXP1              | 4.56E-03       | 1.54             | Th17 up            |                |                  |                   | 3.65E-03       | 1.57             | Th1/17 up            |
| GBP1               |                |                  |                    | 3.07E-03       | 1.88             | Th1 up            | 4.08E-04       | 2.31             | Th1/17 up            |
| GPI                | 9.90E-03       | -1.82            | Th17 down          | 2.21E-02       | -1.59            | Th1 down          | 3.97E-03       | -2.22            | Th1/17 down          |
| HDAC9              |                |                  |                    |                |                  |                   | 2.50E-02       | -1.56            | Th1/17 down          |
| HIF1A              |                |                  |                    |                |                  |                   | 2.33E-02       | -1.51            | Th1/17 down          |
| IFI30              | 7.54E-03       | -2.94            | Th17 down          |                |                  |                   | 1.34E-02       | -2.38            | Th1/17 down          |
| IFI44              | 4.09E-03       | 3.56             | Th17 up            | 3.37E-01       | 1.59             | Th1 up            | 1.33E-02       | 2.97             | Th1/17 up            |
| IFI6               | 3.31E-02       | 1.81             | Th17 up            | 3.77E-02       | 1.78             | Th1 up            | 9.87E-02       | 1.57             | Th1/17 up            |
| IFITM2             | 2.08E-03       | -2.19            | Th17 down          | 6.76E-03       | -1.74            | Th1 down          | 2.26E-03       | -2.14            | Th1/17 down          |
| IFITM3             | 2.44E-02       | -4.02            | Th17 down          | 1.09E-01       | -1.90            | Th1 down          | 1.80E-02       | -5.29            | Th1/17 down          |
| IGF1               | 1.11E-01       | -2.56            | Th17 down          |                |                  |                   | 6.37E-02       | -3.88            | Th1/17 down          |
| IRGM               | 7.74E-02       | 2.01             | Th17 up            | 7.71E-02       | 2.01             | Th1 up            | 2.82E-01       | 1.56             | Th1/17 up            |
| LAG3               | 1.50E-01       | 2.06             | Th17 up            | 4.33E-02       | 2.64             | Th1 up            | 4.04E-01       | 1.58             | Th1/17 up            |
| LGALS3             | 1.82E-03       | 3.33             | Th17 up            | 2.23E-01       | 1.60             | Th1 up            | 1.41E-02       | 2.50             | Th1/17 up            |
| LRP1               | 1.46E-02       | -7.23            | Th17 down          | 2.84E-02       | -3.69            | Th1 down          |                |                  |                      |
| LYN                | 3.58E-02       | -6.90            | Th17 down          |                |                  |                   | 3.42E-02       | -7.48            | Th1/17 down          |
| MET                | 9.03E-03       | -23.37           | Th17 down          | 3.40E-02       | -3.23            | Th1 down          | 1.01E-02       | -14.91           | Th1/17 down          |
| MICA               |                |                  |                    |                |                  |                   | 1.43E-03       | 1.61             | Th1/17 up            |
| MIF                | 3.59E-02       | -1.64            | Th17 down          | 3.02E-02       | -1.69            | Th1 down          | 9.03E-03       | -2.22            | Th1/17 down          |
| MX1                | 1.08E-02       | 2.48             | Th17 up            |                |                  |                   |                |                  |                      |
| OAS1               | 2.36E-03       | 1.98             | Th17 up            |                |                  |                   |                |                  |                      |
| OSM                | 1.22E-02       | -3.12            | Th17 down          | 1.53E-02       | -2.81            | Th1 down          | 9.71E-03       | -3.53            | Th1/17 down          |
| PSME2              | 1.20E-02       | 1.62             | Th17 up            |                |                  |                   |                |                  |                      |
| PTPRC              | 1.70E-01       | 2.88             | Th17 up            | 1.84E-01       | 2.81             | Th1 up            | 5.91E-02       | 3.80             | Th1/17 up            |
| S1PR1              | 4.97E-02       | -2.22            | Th17 down          | 1.47E-01       | -1.59            | Th1 down          | 2.20E-02       | -3.20            | Th1/17 down          |
| SELL               | 5.73E-02       | 1.79             | Th17 up            | 1.07E-01       | 1.63             | Th1 up            |                |                  |                      |

|                 |          |       |           |          |       |          |          |       |             |
|-----------------|----------|-------|-----------|----------|-------|----------|----------|-------|-------------|
| <b>SH2D1A</b>   | 5.84E-03 | -3.99 | Th17 down | 4.08E-02 | -1.87 | Th1 down | 7.02E-03 | -3.57 | Th1/17 down |
| <b>TAP2</b>     |          |       |           |          |       |          | 2.34E-02 | -1.53 | Th1/17 down |
| <b>TIMP1</b>    | 6.36E-03 | -2.99 | Th17 down | 1.26E-02 | -2.33 | Th1 down | 1.31E-02 | -2.30 | Th1/17 down |
| <b>TP53INP1</b> | 3.12E-02 | 2.01  | Th17 up   | 4.23E-02 | 1.93  | Th1 up   | 2.08E-02 | 2.12  | Th1/17 up   |
| <b>TXLNA</b>    |          |       |           |          |       |          | 1.41E-02 | -1.87 | Th1/17 down |
| <b>TYK2</b>     |          |       |           |          |       |          | 9.31E-02 | -1.52 | Th1/17 down |
| <b>UTS2</b>     | 4.24E-02 | 2.33  | Th17 up   | 3.45E-01 | 1.53  | Th1 up   | 2.99E-02 | 2.47  | Th1/17 down |
| <b>VEGFA</b>    | 8.98E-02 | -1.86 | Th17 down | 5.92E-02 | -2.13 | Th1 down | 3.73E-02 | -2.56 | Th1/17 down |
| <b>XCRI</b>     |          |       |           | 8.06E-02 | 2.50  | Th1 up   |          |       |             |
| <b>ZBTB7B</b>   |          |       |           |          |       |          | 5.85E-02 | -1.65 | Th1/17 down |

**Table S2: Inflammatory & immunity transcriptome data set of activated Th-like Treg subsets: Migration pathways, related to Figure 4 and 6.**

Heat map table showing p values and fold-regulation of RNA-Seq data set obtained from Th-like Treg subsets 3 days post-TCR activation using Partek® Software. Th17, Th1 and Th1/17 Th-like Treg subsets were Test Groups, whereas Th2-like Tregs was the Control Group. *Exclusion criteria:* Genes with fold change <1.5 or with average molecular tag count <10, in both the Control and Test Groups or with p value higher than 0.1 in the three Test Groups vs Control are not shown in this table. *Colours:* **RED** represents higher expression in Th2-like Tregs, **GREEN** higher expression in Th17-like Tregs, **BLUE** higher expression in Th1-like Tregs and **PINK** higher expression in Th1/17-like Tregs. Genes were clustered according to the Human Inflammation & Immunity Transcriptome gene list and Partek® Pathway.

| Patient | Tissue of Cance | Type of Cancer             | Cancer location | Stage AJCC       | Age | Gender | Tissue | PBMC | Therapy                    |
|---------|-----------------|----------------------------|-----------------|------------------|-----|--------|--------|------|----------------------------|
| 1       | Skin            | Melanoma                   | Lower leg       | IV               | 84  | Male   | Yes    | No   | None                       |
| 2       | Skin            | Melanoma                   | Upper arm       | IV               | 59  | Male   | Yes    | Yes  | None                       |
| 3       | Skin            | Melanoma                   | Elbow           | IV               | 77  | Female | Yes    | Yes  | None                       |
| 4       | Skin            | Melanoma                   | Chest Wall      | IV               | 65  | Male   | No     | Yes  | None                       |
| 5       | Skin            | Melanoma                   | Left Temple     | IV               | 89  | Male   | No     | Yes  | None                       |
| 6       | Skin            | Melanoma                   | Upper arm       | IV               | 28  | Female | No     | Yes  | Dabrafenib                 |
| 7       | Skin            | Melanoma                   | Post Auricular  | IV               | 28  | Female | No     | Yes  | Dabrafenib<br>Trametinib   |
| 8       | Skin            | Melanoma                   | Leg             | IIIC             | 61  | Female | Yes    | No   | None                       |
| 9       | Skin            | Melanoma                   | Abdomen         | IV               | 70  | Female | No     | Yes  | None                       |
| 10      | Skin            | Melanoma                   | Chest wall      | IV               | 56  | Male   | No     | Yes  | None                       |
| 11      | Skin            | Melanoma                   | Unknown         | IV               | 60  | Male   | No     | Yes  | None                       |
| 12      | Skin            | Melanoma                   | Leg             | IV               | 70  | Female | No     | Yes  | None                       |
| 13      | Colon           | Adenocarcinoma             | Sigmoid         | I<br>(T1N0M0)    | 78  | Male   | Yes    | Yes  | None                       |
| 14      | Colon           | PTLD<br>(B-cell lymphoma)  | Sigmoid         | N/A              | 58  | Male   | Yes    | Yes  | Tacrolimus,<br>Vedolizumab |
| 15      | Colon           | Signet ring adenocarcinoma | Rectum          | IIIC<br>(T3N2M0) | 33  | Male   | No     | Yes  | Vedolizumab                |
| 16      | Colon           | Adenocarcinoma             | Ascending       | IIIC<br>(T4N2M0) | 78  | Female | Yes    | No   | None                       |
| 17      | Colon           | Adenocarcinoma             | Transverse      | I<br>(T2N0M0)    | 69  | Male   | Yes    | Yes  | None                       |
| 18      | Colon           | Adenocarcinoma             | Descending      | IIIA<br>(T4N1M0) | 55  | Female | Yes    | Yes  | None                       |

**Table S3: Description of patient samples, related to Figure 5 and Table 1.**

Blood and tissue samples (from and distant from cancer area) were collected from consecutive patients requiring surgery for melanoma colorectal cancer. Pharmacological treatment was stopped at least two weeks before surgery. **AJCC**: American Joint Committee on Cancer. **PTLD**: Post-transplant lymphoproliferative disease. **N/A**: non applicable. Classification of Malignant Tumours (TNM) in colorectal cancer: **T** describes the size of tumor as T0: no signs of tumor, T1: Tumor in lamina propria or submusoca or  $\leq 2$ cm, T2: Muscularis propria or  $> 2$ cm, T3: Tumor in subserosa, or pericolorectal tissues and T4: Tumor perforates serosa; adjacent structures. **N** describes nearby (regional) lymph

nodes involved: N0: no lymph nodes, N1:  $\leq 3$  regional lymph nodes and N2:  $> 3$  regional lymph nodes.  
**M** describes distant metastasis: M0: no metastasis.

|                                       | #          | P-Value | P-Value      | Fold Change  | Description      | P-Value     | Fold Change | Description     | P-Value        | Fold Change    | Description          |
|---------------------------------------|------------|---------|--------------|--------------|------------------|-------------|-------------|-----------------|----------------|----------------|----------------------|
| Pathway Name                          | Probe Sets | Th Type | Th17 vs. Th2 | Th17 vs. Th2 | Th17 vs. Th2     | Th1 vs. Th2 | Th1 vs. Th2 | Th1 vs. Th2     | Th1/17 vs. TH2 | Th1/17 vs. TH2 | Th1/17 vs. TH2       |
| Endometrial cancer                    | 6          | 2.2E-03 | 2.4E-03      | -1.55        | TH17 down vs TH2 | 3.2E-03     | -1.5        | TH1 down vs TH2 | 4.2E-04        | -1.99          | TH1-TH17 down vs TH2 |
| Huntington's disease                  | 3          | 1.1E-02 | 1.0E-02      | 1.18         | TH17 up vs TH2   | 6.6E-01     | 1.0         | TH1 up vs TH2   | 2.0E-01        | -1.08          | TH1-TH17 down vs TH2 |
| Thyroid cancer                        | 4          | 2.0E-02 | 3.1E-02      | -1.43        | TH17 down vs TH2 | 1.3E-02     | -1.6        | TH1 down vs TH2 | 4.4E-03        | -1.91          | TH1-TH17 down vs TH2 |
| MicroRNAs in cancer                   | 24         | 2.3E-02 | 1.7E-02      | -1.31        | TH17 down vs TH2 | 2.2E-02     | -1.3        | TH1 down vs TH2 | 5.1E-03        | -1.45          | TH1-TH17 down vs TH2 |
| Pancreatic cancer                     | 19         | 2.4E-02 | 1.1E-02      | -1.26        | TH17 down vs TH2 | 4.4E-02     | -1.2        | TH1 down vs TH2 | 6.4E-03        | -1.30          | TH1-TH17 down vs TH2 |
| Colorectal cancer                     | 10         | 3.6E-02 | 4.1E-02      | -1.28        | TH17 down vs TH2 | 2.3E-02     | -1.3        | TH1 down vs TH2 | 8.2E-03        | -1.48          | TH1-TH17 down vs TH2 |
| Viral carcinogenesis                  | 39         | 4.0E-02 | 3.5E-02      | 1.25         | TH17 up vs TH2   | 9.2E-02     | 1.2         | TH1 up vs TH2   | 8.1E-03        | 1.36           | TH1-TH17 up vs TH2   |
| Acute myeloid leukemia                | 12         | 4.2E-02 | 4.3E-02      | -1.30        | TH17 down vs TH2 | 3.6E-02     | -1.3        | TH1 down vs TH2 | 9.0E-03        | -1.53          | TH1-TH17 down vs TH2 |
| Type II diabetes mellitus             | 7          | 4.6E-02 | 1.3E-02      | -2.46        | TH17 down vs TH2 | 6.6E-02     | -1.6        | TH1 down vs TH2 | 1.9E-02        | -2.20          | TH1-TH17 down vs TH2 |
| Epstein-Barr virus infection          | 45         | 4.6E-02 | 5.4E-02      | 1.24         | TH17 up vs TH2   | 7.9E-02     | 1.2         | TH1 up vs TH2   | 8.8E-03        | 1.39           | TH1-TH17 up vs TH2   |
| Herpes simplex infection              | 74         | 4.6E-02 | 7.9E-02      | 1.18         | TH17 up vs TH2   | 7.3E-02     | 1.2         | TH1 up vs TH2   | 8.6E-03        | 1.34           | TH1-TH17 up vs TH2   |
| Non-alcoholic fatty liver disease     | 24         | 4.8E-02 | 2.9E-02      | -1.32        | TH17 down vs TH2 | 5.4E-02     | -1.3        | TH1 down vs TH2 | 1.1E-02        | -1.44          | TH1-TH17 down vs TH2 |
| Pathogenic Escherichia coli infection | 7          | 5.4E-02 | 1.6E-01      | -1.17        | TH17 down vs TH2 | 6.0E-01     | -1.1        | TH1 down vs TH2 | 1.4E-02        | -1.47          | TH1-TH17 down vs TH2 |
| Renal cell carcinoma                  | 10         | 5.5E-02 | 6.2E-02      | -1.28        | TH17 down vs TH2 | 4.0E-02     | -1.3        | TH1 down vs TH2 | 1.2E-02        | -1.51          | TH1-TH17 down vs TH2 |
| Proteoglycans in cancer               | 29         | 5.6E-02 | 4.4E-02      | -1.30        | TH17 down vs TH2 | 4.1E-02     | -1.3        | TH1 down vs TH2 | 1.3E-02        | -1.46          | TH1-TH17 down vs TH2 |
| Viral myocarditis                     | 19         | 5.8E-02 | 5.5E-02      | 1.29         | TH17 up vs TH2   | 9.2E-02     | 1.2         | TH1 up vs TH2   | 1.2E-02        | 1.44           | TH1-TH17 up vs TH2   |
| HTLV-I infection                      | 56         | 5.9E-02 | 8.2E-02      | 1.13         | TH17 up vs TH2   | 1.1E-01     | 1.1         | TH1 up vs TH2   | 1.1E-02        | 1.23           | TH1-TH17 up vs TH2   |
| Basal cell carcinoma                  | 2          | 6.4E-02 | 1.0E-01      | -1.40        | TH17 down vs TH2 | 1.1E-01     | -1.4        | TH1 down vs TH2 | 1.2E-02        | -2.11          | TH1-TH17 down vs TH2 |
| Non-small cell lung cancer            | 6          | 6.6E-02 | 1.4E-01      | -1.26        | TH17 down vs TH2 | 7.5E-02     | -1.4        | TH1 down vs TH2 | 1.3E-02        | -1.73          | TH1-TH17 down vs TH2 |
| Graft-versus-host disease             | 20         | 7.2E-02 | 9.3E-02      | 1.22         | TH17 up vs TH2   | 8.3E-02     | 1.2         | TH1 up vs TH2   | 1.4E-02        | 1.37           | TH1-TH17 up vs TH2   |
| Asthma                                | 11         | 8.0E-02 | 2.9E-02      | -5.23        | TH17 down vs TH2 | 4.8E-02     | -3.4        | TH1 down vs TH2 | 3.1E-02        | -4.93          | TH1-TH17 down vs TH2 |
| Pathways in cancer                    | 57         | 8.0E-02 | 2.7E-02      | -1.36        | TH17 down vs TH2 | 8.4E-02     | -1.2        | TH1 down vs TH2 | 2.9E-02        | -1.36          | TH1-TH17 down vs TH2 |
| Type I diabetes mellitus              | 23         | 8.9E-02 | 1.4E-01      | 1.16         | TH17 up vs TH2   | 1.1E-01     | 1.2         | TH1 up vs TH2   | 1.8E-02        | 1.30           | TH1-TH17 up vs TH2   |
| Bladder cancer                        | 11         | 1.0E-01 | 6.6E-02      | -1.44        | TH17 down vs TH2 | 5.6E-02     | -1.5        | TH1 down vs TH2 | 2.8E-02        | -1.65          | TH1-TH17 down vs TH2 |
| Autoimmune thyroid disease            | 26         | 1.1E-01 | 1.3E-01      | 1.19         | TH17 up vs TH2   | 1.3E-01     | 1.2         | TH1 up vs TH2   | 2.4E-02        | 1.33           | TH1-TH17 up vs TH2   |
| Allograft rejection                   | 24         | 1.1E-01 | 1.5E-01      | 1.19         | TH17 up vs TH2   | 1.2E-01     | 1.2         | TH1 up vs TH2   | 2.4E-02        | 1.33           | TH1-TH17 up vs TH2   |
| Amyotrophic lateral sclerosis         | 9          | 1.5E-01 | 8.1E-02      | -1.29        | TH17 down vs TH2 | 8.6E-02     | -1.3        | TH1 down vs TH2 | 4.4E-02        | -1.38          | TH1-TH17 down vs TH2 |
| Melanoma                              | 6          | 1.5E-01 | 7.7E-02      | -1.41        | TH17 down vs TH2 | 1.2E-01     | -1.3        | TH1 down vs TH2 | 4.1E-02        | -1.55          | TH1-TH17 down vs TH2 |
| Small cell lung cancer                | 15         | 1.5E-01 | 4.4E-02      | -1.73        | TH17 down vs TH2 | 1.5E-01     | -1.4        | TH1 down vs TH2 | 7.4E-02        | -1.56          | TH1-TH17 down vs TH2 |

**Table S4: Pathways ANOVA between Th-like Treg subsets, related to Figure 6.**

Results of pathway ANOVA performed using Partek® Genomics Suite® software, version 6.6. Pathways shown are KEGG pathways (number of genes considered as part of pathway in ANOVA)

indicated in second column) significantly enriched within at least one comparison of pathway ANOVA (Th17 vs Th2, Th1 vs Th2 or Th1/Th17 vs Th2). Pathways are displayed in ascending order based on overall pathway significance (p-value <0.05 are indicated in orange). *Colours*: **RED** represents higher expression in Th2-like Tregs, **GREEN** higher expression in Th17-like Tregs, **BLUE** higher expression in Th1-like Tregs and **PINK** higher expression in Th1/17-like Tregs (p-value <0.1 are coloured).



## Supplemental Experimental Procedures

### Culture conditions and sorting strategy

For *in vitro* assays, cells were cultured in X-VIVO15 (Lonza) supplemented with L-Glutamine 2mM, penicillin/streptomycin 100U/mL (both Thermo Fisher) and 10% of Human Serum AB Male (BioWest). Pre-enriched Th-like Treg and Teff were analysed before and after sorting. Th-like Treg and Teff subsets were of >98 purity.

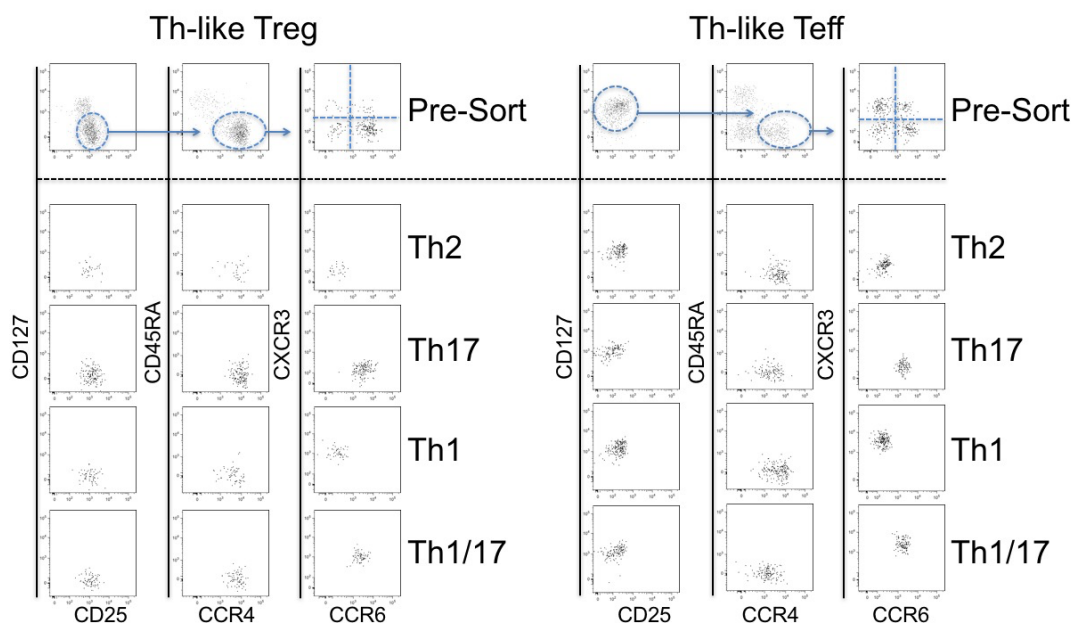

### Sorting strategy.

#### TIGIT, PDL-1, PD-1, HLA-DR, CTLA-4 expression and cytokine analysis

FACS-sorted Th-like Tregs ( $0.5-1 \times 10^5$ ), total memory Tregs ( $0.5 \times 10^5$ ) and Teff ( $1 \times 10^5$ ) were stimulated with anti-CD3/CD28 beads at a 4:1 (cell: bead) ratio. After 72h, TIGIT, PDL-1, PD-1, HLA-DR, CTLA-4 were evaluated using surface staining. Supernatant were used to detect human T-cell cytokine production using LEGENDplex Human Th-Cytokine Assay (BioLegend) and BD Cytometric Bead Array following manufacturer's instructions. Cytokines were acquired on a FACSCanto II (BD Biosciences). Data analysis was carried out on LEGENDplex™ Data Analysis Software or FCAP Array™ Software (BD Biosciences).

#### ERK Activation and western blot

FACS-sorted subpopulations ( $1 \times 10^5$ ) were activated with plate bound CD3/CD28 (R&D Systems) ( $2 \mu\text{g/mL}$ ) for 10min/ $37^\circ\text{C}$  after spin 1800rpm/3min/ $20^\circ\text{C}$ . Cell lysates were prepared using RIPA buffer (Thermo Fisher) supplemented with protease inhibitors (Calbiochem). Samples were electrophoresed on 10% SDS polyacrylamide gels and transferred to nitrocellulose membranes. After blocking, membranes were incubated with phospho-p44/42 MAPK (Erk1/2) (Thr202/Tyr204) (Cell Signalling) overnight at  $4^\circ\text{C}$ . The following day, proteins were detected with chemiluminescence detection reagents (BIORAD) after HRP conjugated secondary antibody incubation using ImageQuant LASS4000 mini (GE Healthcare Life Science), quantified with ImageQuant TL software. Blots were stripped and incubated with p44/42 MAPK (Erk1/2) (Thr202/Tyr204) (Cell Signalling). Same protocol was used for p53 and Stat5 detection.

#### Intracellular staining

Cells were activated with PMA and Ionomycin for 3h at  $37^\circ\text{C}$ . Then, cells were stained with anti-CD4 APC/Cy7, anti-CD3 PerCP/Cy5.5, anti-CD8 Brilliant Violet-711 and anti-CD20 Brilliant Violet-605. Intracellular staining was performed with the Foxp3/Transcription Factor Staining Buffer Set (eBioscience) using anti-FoxP3, anti-IL-2, anti-IL-4, anti-IL-10, anti-IL-17 and anti-IFN- $\gamma$  30min/ $4^\circ\text{C}$ /dark. Samples were then acquired on LSR-Fortessa flow cytometer and files analysed using FlowJo (Tree Star Inc.). Gates were set based on biological, Fluorescent minus one and isotype

controls.

### **Tissue Collection and Research Ethics Committee**

Spleen samples were obtained from deceased human liver or kidney donors and perfusates were obtained from liver grafts at King's College Hospital (both approved by St Thomas' Ethics Committee, reference number: 09/H0802/100). Healthy colon biopsies and colon resections from cancer patients were obtained at King's College Hospital (approved by the London-Dulwich Research Ethics Committee, reference number: 15/LO/1998). Skin was obtained from surgical procedures at Springfield Hospital (approved by the East London and City Health Authority Research Ethics Committee, reference number: 09/HO704/69). Thymuses were collected during infant cardiac surgery at Great Ormond Street Hospital (approved by the Institute of Child Health/Great Ormond Street Hospital Research Ethics Committee, reference number: 07/Q0508/43). Melanoma samples were obtained from surgical procedures at St Thomas (approved by the King's College London and St Thomas' NHS Trust Ethics Committee, reference number: 08/H0804/139 and 16/LO/0366). Informed consent was obtained from all study participants or their representatives in accordance with the Declaration of Helsinki.

#### **-Thymus**

Thymuses were washed 3-4 times with PBS, cut into pieces (<0.5cm) and transferred into a gentleMACS tube (Miltenyi Biotec) with X-VIVO15 containing dissociation media (0.2mg/mL of collagenase type XI-S, 0.1mg/mL of DNaseI and 0.5µg/mL Fungizone). Samples were then dissociated using Gentle MACS dissociator (Miltenyi Biotec). Samples were incubated for 15min at 37°C and dissociated again using Gentle MACS dissociator. After dissociation, samples were washed and filtered 3 times using 70µm cell strainers. Cells were counted and  $2 \times 10^6$  cells were phenotyped.

#### **-Spleen**

Spleens were washed with PBS, cut into pieces <0.5cm and dissociated mechanically with a 2mL syringe in a 50mL Falcon tube containing a 70µm cell strainer. Cells were then washed (2000rpm/10min/4°C), cell pellet was resuspended in PBS and viable splenocytes were isolated using density-gradient centrifugation. Cells were then counted and  $2 \times 10^6$  cells were phenotyped.

#### **-Liver Perfusates**

Hepatic perfusates were obtained by collecting the second perfusion of the grafts through the portal vein with 1L of saline solution. The collected fluids from the vena cava was stored at 5°C and processed within 6h. Viable hepatic mononuclear cells were isolated using density-gradient centrifugation. Cells were then counted and  $2 \times 10^6$  cells were phenotyped.

#### **-Healthy Skin**

Skin was washed 3-4 times with PBS, cut into small pieces <0.1cm and transferred into a 20mL pot with X-VIVO15 containing collagenase (1mg/mL) and DNase (10U/mL). Samples were incubated for 45min at 37°C in agitation. After dissociation, samples were washed, filtered and viable mononuclear cells were isolated using density-gradient centrifugation. Cells were then counted and phenotyped.

#### **-Melanoma (Skin Cancer)**

Melanoma specimens were cut in small pieces and mechanically disaggregated using a GentleMACS dissociator (Miltenyi Biotec). Single cell suspensions were left overnight at 37°C 5%CO<sub>2</sub> in RPMI media containing 10% Fetal Calf Serum and penicillin/streptomycin 100U/mL. Next day, supernatant samples were collected for cytokine analysis and DNaseI (10U/ml) was added to the cultures for 20min at 37°C. Cells suspensions were then filtered through a 100µm mesh and viable cells were isolated using density-gradient centrifugation. Cells were then counted and phenotyped.

#### **-Colorectal cancer resections (Colon Cancer) and healthy colon biopsies**

Colon resections from patients with colorectal cancer and post-transplant lymphoproliferative disease (PLTD in the colon) were obtained after surgery at King's College Hospital. A mucosal sample from the cancer area and a distant sample from the cancer area were obtained and processed similarly to healthy colon biopsies. Briefly, colon mucosa was cut into 3-4mm pieces and incubated with 1mM-EDTA/HBSS 37°C 5%CO<sub>2</sub> for 15min with agitation. Colon samples were then cut into small pieces <1mm and transferred into a 20mL pot with X-VIVO15 containing collagenase (1mg/mL) and DNase (10U/mL). Samples were incubated for 2h at 37°C in agitation. After dissociation, samples were washed, filtered and viable colonic mononuclear cells were isolated using density-gradient centrifugation. Cells were then counted and  $2 \times 10^6$  cells were phenotyped.

| Reagents                                                                     | Catalogue                  | Company                            |
|------------------------------------------------------------------------------|----------------------------|------------------------------------|
| Agilent High Sensitivity DNA Kit                                             | 5067-4626                  | Agilent Technologies               |
| IL-2 (5344.111) FITC                                                         | 340448                     | BD Biosciences                     |
| CD4 (SK3) Brilliant Ultra Violet 395                                         | 563552                     | BD Biosciences                     |
| Tbet (O4-46) Brilliant Violet 786                                            | 564141                     | BD Biosciences                     |
| ROR $\gamma$ t (Q21-559) Alexa Fluor 647                                     | 563620                     | BD Biosciences                     |
| CXCR3 (1C6) Alexa Fluor 700                                                  | 561320                     | BD Biosciences                     |
| CCR8 (433H) [CD198] Brilliant Violet 421                                     | 566380                     | BD Biosciences                     |
| CD152 [CTLA-4] (BNI3) APC                                                    | 555855                     | BD Biosciences                     |
| Stat5 pY694 (47/Stat5(pY694))                                                | 611819                     | BD Biosciences                     |
| Stat5 (89/Stat5)                                                             | 610192                     | BD Biosciences                     |
| BD <sup>TM</sup> Cytometric Bead Array (CBA) Human Th1/Th2/Th17 cytokine kit | 560484                     | BD Biosciences                     |
| Annexin V Alexa Fluor 647                                                    | 640943                     | BioLegend                          |
| CCR4 (L291H4) PECy7                                                          | 359410                     | BioLegend                          |
| CCR4 (L291H4) PerCP/Cy5.5                                                    | 359406                     |                                    |
| CCR6 (G034E3) Brilliant Violet 605                                           | 353420                     | BioLegend                          |
| CD3 (OKT3) PerCP/Cy5.5                                                       | 317336                     | BioLegend                          |
| CD4 (OKT4) PerCPCy5.5                                                        | 317428                     | BioLegend                          |
| CD4 (OKT4) Brilliant Violet 421                                              | 317434                     |                                    |
| CD8 (SK1) Brilliant Violet 711                                               | 344734                     | BioLegend                          |
| CD25 (M-A251) PE                                                             | 356104                     | BioLegend                          |
| CD45 (HI30) Brilliant Violet 711                                             | 304050                     | BioLegend                          |
| CD45RA (H110) APC/Cy7                                                        | 304128                     | BioLegend                          |
| CD45RA (H110) PECy7                                                          | 304126                     |                                    |
| CD127 (A019D5) APC                                                           | 351318                     | BioLegend                          |
| CD127 (A019D5) Brilliant Violet 711                                          | 351328                     |                                    |
| CXCR3 (G025H7) FITC                                                          | 353704                     | BioLegend                          |
| FoxP3 (259D) Pacific Blue <sup>TM</sup>                                      | 320216                     | BioLegend                          |
| GATA3 (16E10A23) Alexa Fluor 647                                             | 653810                     | BioLegend                          |
| HLA-DR (L243) Alexa Fluor 647                                                | 307621                     | BioLegend                          |
| IL-2 (MQ1-17H12) FITC                                                        | 500304                     | BioLegend                          |
| LEGENDplex Human Th Cytokine Assay                                           | 740001                     | BioLegend                          |
| PD-1 (EH12.2H7) [CD279] Brilliant Violet 421                                 | 329919                     | BioLegend                          |
| PDL-1 (29E.2A3) [CD274] [B7-H1] PECy7                                        | 329717                     | BioLegend                          |
| Recombinant Human ICAM-1-Fc Chimera                                          | 552904                     | BioLegend                          |
| Recombinant Human CCL17 [TARC]                                               | 573802                     | BioLegend                          |
| Recombinant Human CCL20 [MIP-3 $\alpha$ ]                                    | 583802                     | BioLegend                          |
| Recombinant Human CXCL10 [IP-10]                                             | 573502                     | BioLegend                          |
| Recombinant Human CCL22 [MDC]                                                | 584902                     | BioLegend                          |
| TIGIT (A15153G) [VSTM3] APC                                                  | 372706                     | BioLegend                          |
| Mouse MAb Anti-Human IL-2 (B-G5)                                             | AHC0022                    | BioSource International            |
| Direct-zol <sup>TM</sup> RNA MicroPrep Zymo-Spin IC Col.                     | R2060                      | Cambridge Bioscience               |
| phospho-p44/42 MAPK [Erk1/2] Thr202/Tyr204                                   | #9101                      | Cell Signalling                    |
| p44/42 MAPK [Erk1/2]                                                         | #9102                      | Cell Signalling                    |
| HSP90 (C45G5)                                                                | #4877                      | Cell Signalling                    |
| P53 (1C12)                                                                   | #2524                      | Cell Signalling                    |
| IL-4 (8D4-8) PE                                                              | 12-7049                    | eBioscience                        |
| IL-17 (eBio64DEC17) PE-Cy7                                                   | 25-7179                    | eBioscience                        |
| FoxP3/Transcription Factor Staining Buffer                                   | 00-5523-00                 | eBioscience                        |
| FoxP3 (PCH10) eFluor 450                                                     | 48-4776-42                 | eBioscience                        |
| MiSeq Reagent Kit v3                                                         | MS-102-3001                | Illumina                           |
| CD25 MicroBeads II                                                           | 130-092-983                | Milltenyi Biotec                   |
| Recombinant IL-2                                                             | Proleukin<br>PL 00101/0936 | Novartis Pharmaceuticals<br>UK Ltd |
| The Human Inflammation & Immunity Transcriptome RNA targeted panel 12-Index  | RHS-005Z<br>333114         | QIAGEN                             |
| CD3 (UCHT1)                                                                  | MAB100                     | R&D                                |

|                                                            |             |                          |
|------------------------------------------------------------|-------------|--------------------------|
| CD28 (37407)                                               | MAB342      | R&D                      |
| Human IL-4 MAb (34019)                                     | MAB204      | R&D                      |
| Human IFN-gamma MAb (25718)                                | MAB285      | R&D                      |
| Human IL-17 MAb (C41809)                                   | MAB317      | R&D                      |
| CORNING HTS TRANSWELL-96W                                  | CLS3388-2EA | Sigma-Aldrich            |
| RosetteSep® Human CD4 <sup>+</sup> T Cell Enrich. Cocktail | 767 CAD     | STEMCELL                 |
| CountBright™ Absolute Counting Beads                       | C36950      | Thermo Fisher Scientific |
| CellTrace™ Violet Cell Proliferation Kit                   | C34557      | Thermo Fisher Scientific |
| IFN- $\gamma$ (B27) APC                                    | MHCIFG05    | Thermo Fisher Scientific |
| LIVE/DEAD® Fixable Near-IR Dead Cell Stain Kit             | L10119      | Thermo Fisher Scientific |

**Reagents:** List of reagents used in this study including clones ( ), alternative names [ ], fluorochromes, catalogue numbers and suppliers.
